# Supplementary material for: Palladium-catalyzed alkyne polyannulation of diphenols and unactivated internal diynes: a new synthetic route to functional heterocyclic polymers
Source: Royal Society of Chemistry journal article supplement (doi:10.1039/c5py01466b), 2015-10-23
Supplement: c5py01466b1.pdf [file c5py01466b1.pdf]

Electronic Supporting Information

# Palladium-catalyzed alkyne polyannulation of diphenols and unactivated internal diynes: a new synthetic route to functional hetrocyclic polymers

Yun Zhang,<sup>ab</sup> Jacky W. Y. Lam,<sup>\*ab</sup> and Ben Zhong Tang<sup>\*abc</sup>

<sup>a</sup> HKUST-Shenzhen Research Institute, No. 9 Yuexing 1st RD, South Area, Hi-tech Park, Nanshan, Shenzhen 518057, China.

<sup>b</sup> Department of Chemistry, Institute for Advanced Study, Institute of Molecular Functional Materials, Division of Biomedical Engineering, Division of Life Science and State Key Laboratory of Molecular Neuroscience, The Hong Kong University of Science & Technology, Clear Water Bay, Kowloon, Hong Kong.

<sup>c</sup> Guangdong Innovative Research Team, SCUT-HKUST Joint Research Laboratory, State Key Laboratory of Luminescent Materials and Devices, South China University of Technology, Guangzhou 510640, China.

## Table contents

**Table S1** Crystal data and structure refinement for model compound **3**.

**Fig. S1** Emission spectra of **P1/2d** in THF solution and as solid film. Solution concentration: 10  $\mu$ M; excitation wavelength: 325 nm.

**Table S1** Crystal data and structure refinement for model compound **3**.

|                                   |                                                  |                  |
|-----------------------------------|--------------------------------------------------|------------------|
| Empirical formula                 | C <sub>21</sub> H <sub>16</sub> O <sub>3</sub> S |                  |
| Formula weight                    | 348.40                                           |                  |
| Temperature                       | 173.15 K                                         |                  |
| Wavelength                        | 1.5418 Å                                         |                  |
| Crystal system                    | Triclinic                                        |                  |
| Space group                       | P-1                                              |                  |
| Unit cell dimensions              | a = 9.8165(6) Å                                  | α = 100.954(7)°. |
|                                   | b = 12.2268(10) Å                                | β = 94.518(6)°.  |
|                                   | c = 14.5725(12) Å                                | γ = 94.518(6)°.  |
| Volume                            | 1655.1(2) Å <sup>3</sup>                         |                  |
| Z                                 | 4                                                |                  |
| Density (calculated)              | 1.398 Mg/m <sup>3</sup>                          |                  |
| Absorption coefficient            | 1.880 mm <sup>-1</sup>                           |                  |
| F(000)                            | 728                                              |                  |
| Crystal size                      | 0.30 × 0.08 × 0.04 mm <sup>3</sup>               |                  |
| Theta range for data collection   | 9.40 to 67.49°.                                  |                  |
| Index ranges                      | -8 ≤ h ≤ 11, -14 ≤ k ≤ 14, -17 ≤ l ≤ 17          |                  |
| Reflections collected             | 9565                                             |                  |
| Independent reflections           | 5695 [R(int) = 0.0495]                           |                  |
| Completeness to theta = 66.50°    | 95.83 %                                          |                  |
| Absorption correction             | Semi-empirical from equivalents                  |                  |
| Max. and min. transmission        | 1.00000 and 0.81802                              |                  |
| Refinement method                 | Full-matrix least-squares on F <sup>2</sup>      |                  |
| Data / restraints / parameters    | 5695 / 0 / 453                                   |                  |
| Goodness-of-fit on F <sup>2</sup> | 1.001                                            |                  |
| Final R indices [I > 2σ(I)]       | R1 = 0.0539, wR2 = 0.1251                        |                  |
| R indices (all data)              | R1 = 0.0823, wR2 = 0.1392                        |                  |
| Largest diff. peak and hole       | 0.625 and -0.412 e.Å <sup>-3</sup>               |                  |

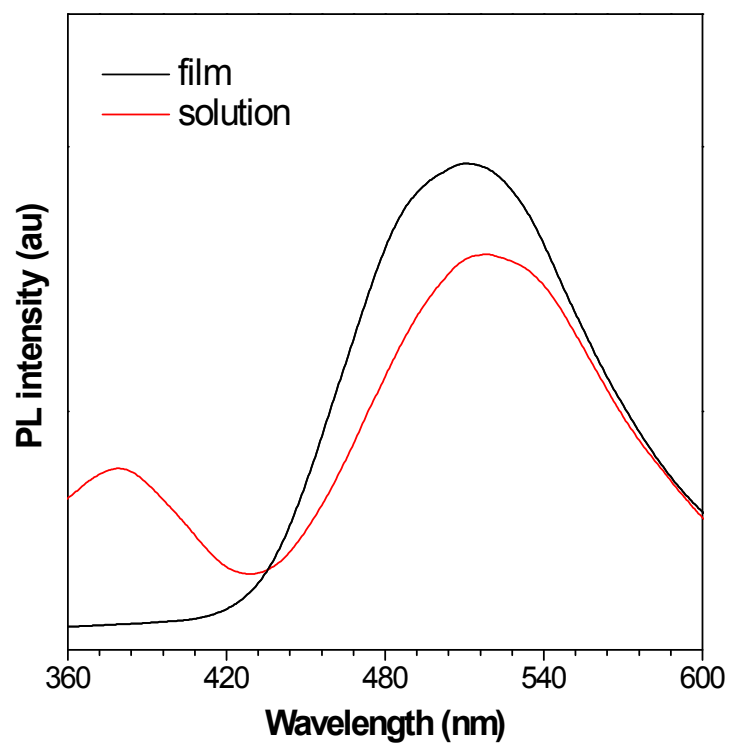

**Fig. S1** Emission spectra of P1/2d in THF solution and as solid film. Solution concentration: 10  $\mu$ M; excitation wavelength: 325 nm.
